# Supplementary material
Source: publisher site journal article supplement (https://www.dovepress.com/article/413028)
Supplement: Supplementary file 1 [file get_supplementary_file.php]

**Supplementary Table 1** Search terms of this study

|  | Search Query |
| --- | --- |
| #1 | TI=(pain OR analgesia OR analgesic OR analgesics OR allodynia OR anti-allodynia OR antiallodynia OR anti-allodynic OR antiallodynic OR hypoalgesia OR hypoalgesic OR hypersensitivity OR hyperalgesia OR anti-hyperalgesia OR antihyperalgesia OR hyperalgesic OR anti-hyperalgesic OR antihyperalgesic OR nociception OR anti-nociception OR antinociception OR nociceptive OR anti-nociceptive OR antinociceptive) |
| #2 | TI=(microglia OR microglial Cell OR iba-1 OR iba1 OR ox42 OR ox-42) |
| #3 | #2 AND #1 |
| #4 | AB=(pain OR analgesia OR analgesic OR analgesics OR allodynia OR anti-allodynia OR antiallodynia OR anti-allodynic OR antiallodynic OR hypoalgesia OR hypoalgesic OR hypersensitivity OR hyperalgesia OR anti-hyperalgesia OR antihyperalgesia OR hyperalgesic OR anti-hyperalgesic OR antihyperalgesic OR nociception OR anti-nociception OR antinociception OR nociceptive OR anti-nociceptive OR antinociceptive) |
| #5 | AB=(microglia OR microglial Cell OR iba-1 OR iba1 OR ox42 OR ox-42) |
| #6 | #4 AND #5 |
| #7 | AK=(pain OR analgesia OR analgesic OR analgesics OR allodynia OR anti-allodynia OR antiallodynia OR anti-allodynic OR antiallodynic OR hypoalgesia OR hypoalgesic OR hypersensitivity OR hyperalgesia OR anti-hyperalgesia OR antihyperalgesia OR hyperalgesic OR anti-hyperalgesic OR antihyperalgesic OR nociception OR anti-nociception OR antinociception OR nociceptive OR anti-nociceptive OR antinociceptive) |
| #8 | AK=(microglia OR microglial Cell OR iba-1 OR iba1 OR ox42 OR ox-42) |
| #9 | #7 AND #8 |
| #10 | #3 OR #6 OR #9 |
| #11 | DOP=(2002-01-01/2022-12-31) |
| #12 | LA=(English) |
| #13 | DT=(Article OR Review) |
| #14 | #10 AND #11 AND #12 AND #13 |
